# Supplementary material for: Prognostic impact of circulating tumor cells detected with the microfluidic “universal CTC‐chip” for primary lung cancer
Source: PubMed Central journal article supplement — Cancer Sci. 2022 Jan 28;113(3):1028–37. doi: 10.1111/cas.15255 (PMC8898730; doi:10.1111/cas.15255), 2022-01-28
Supplement: CAS-113-1028-s001.pdf [file CAS-113-1028-s001.pdf]

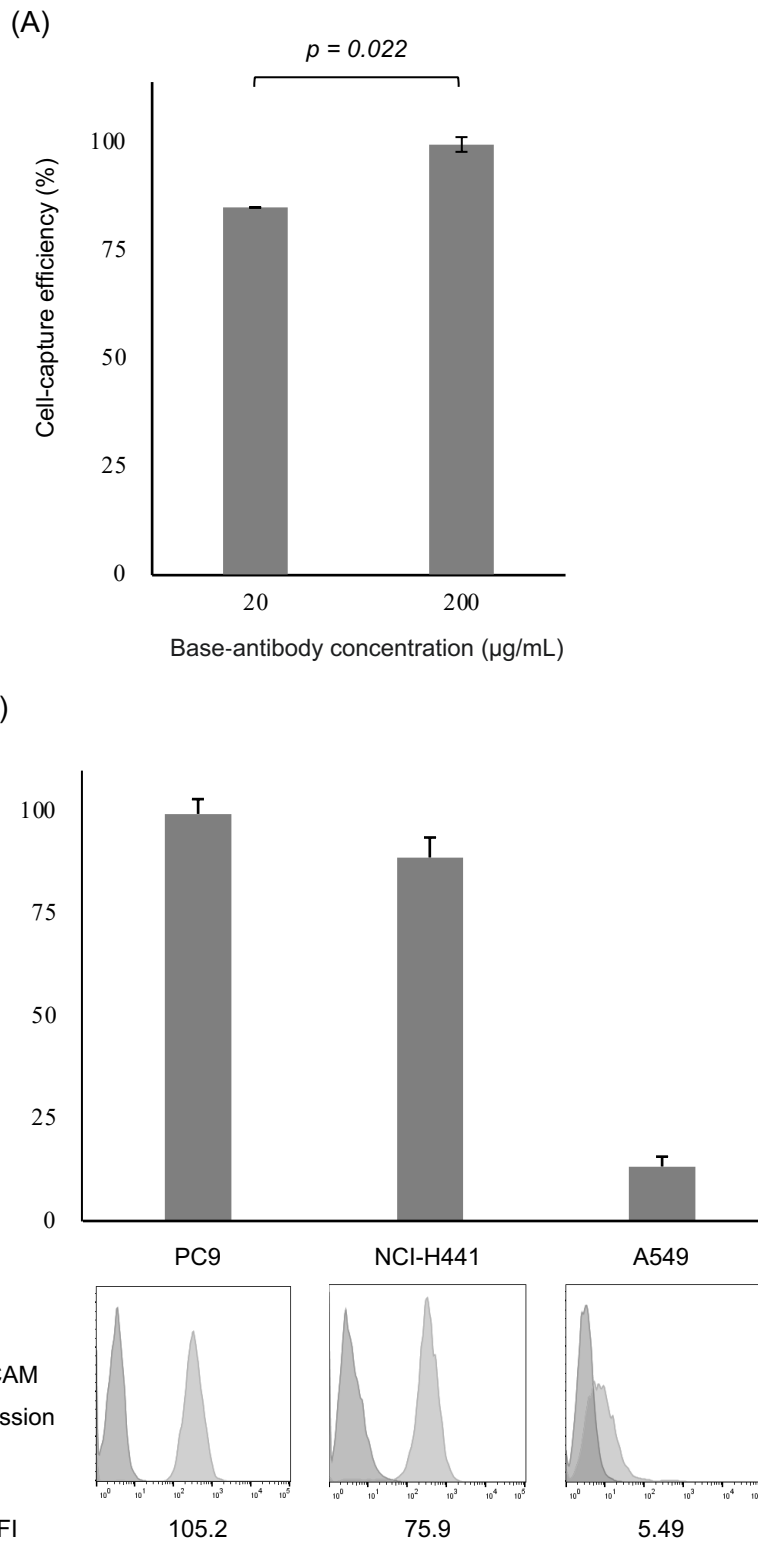

Figure S1: (A) Cell-capture efficacy in a lung cancer cell line (PC9) using the epithelial cell adhesion molecule (EpCAM)-chip at 20  $\mu\text{g/mL}$  and 200  $\mu\text{g/mL}$  base antibody concentrations. (B) Cell-capture efficacy and expression of EpCAM on the surface of lung cancer cell lines detected using flow cytometry. MFI, mean fluorescence intensity.

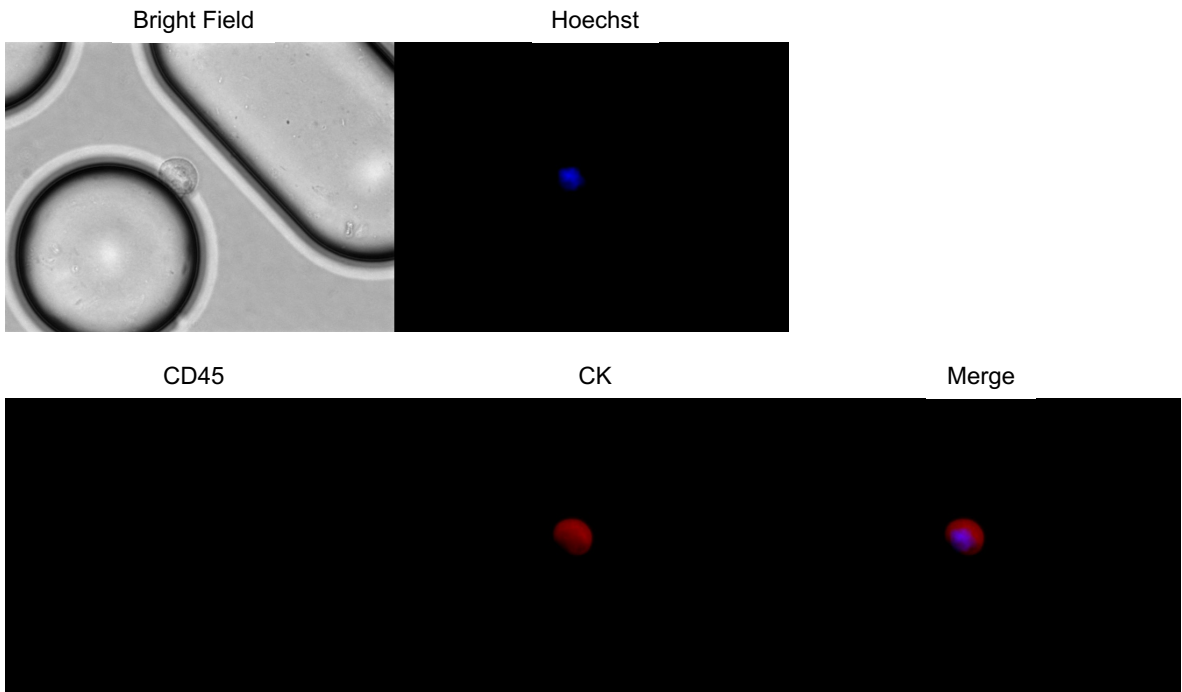

Figure S2: Representative image of immunohistochemical staining of circulating tumor cells (CTCs) captured using the epithelial cell adhesion molecule (EpCAM)-chip. CK, cytokeratin.

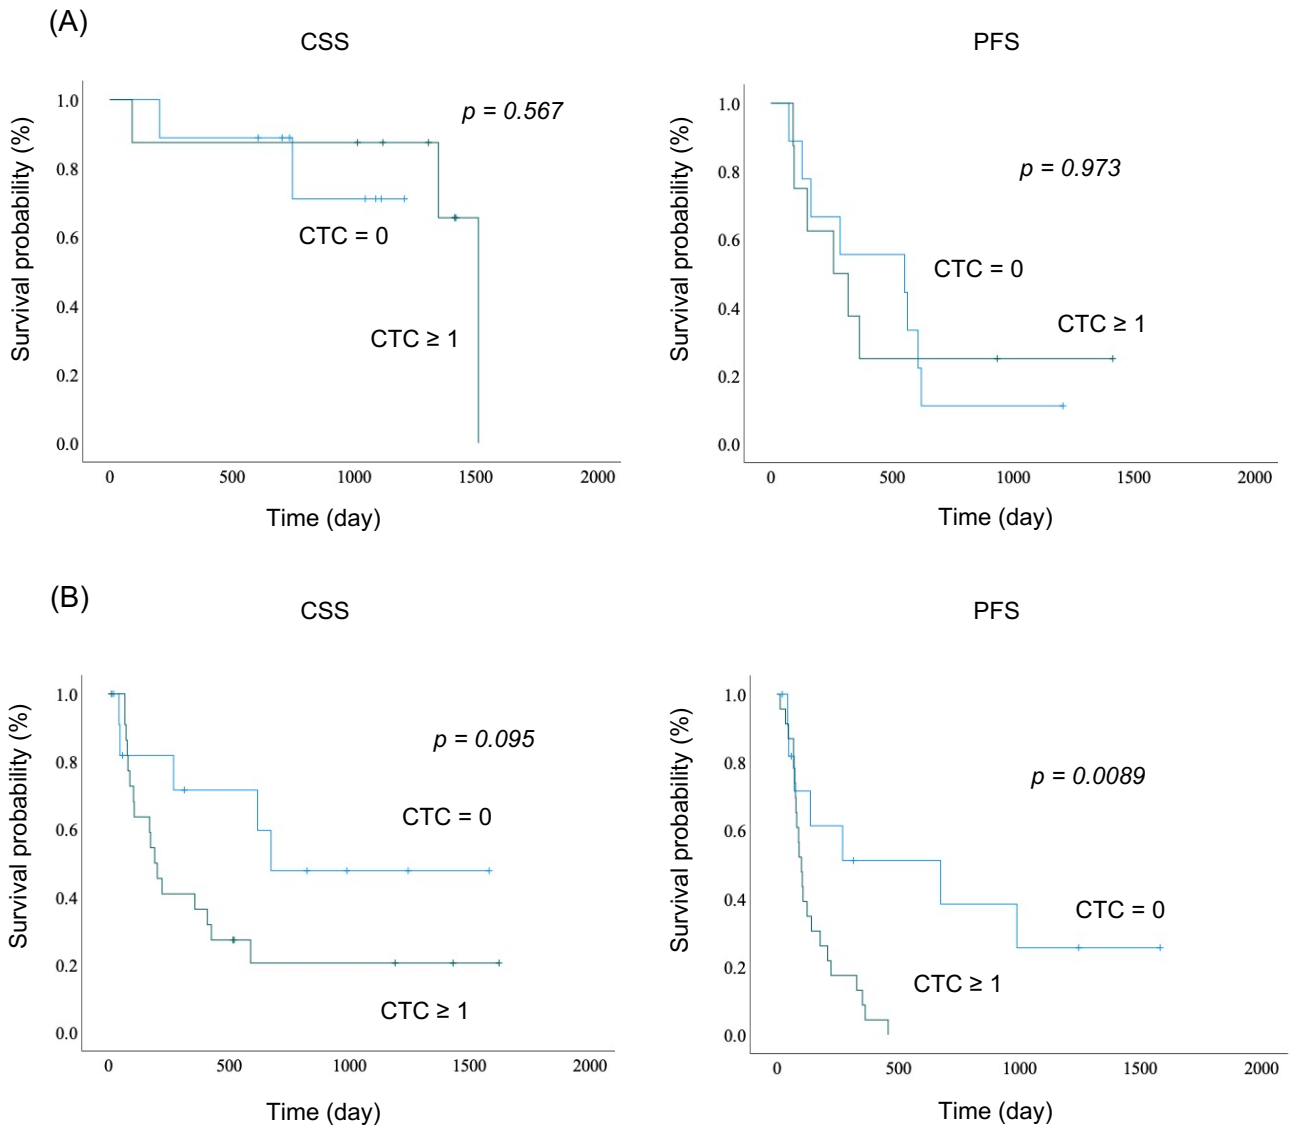

Figure S3: Cancer-specific survival (CSS) and progression-free survival (PFS) according to circulating tumor cell (CTC) count (CTC  $\geq 1$ /CTC = 0) in (A) patients who received molecular targeted drugs and (B) patients who did not receive molecular targeted drugs.
